# Supplementary material for: Reasons for low utilisation of public facilities among households with hypertension: analysis of a population-based survey in India
Source: PubMed Central journal article supplement (PMC6307571; doi:10.1136/bmjgh-2018-001002), 2018-12-20
Supplement: bmjgh-2018-001002supp002.pdf [file bmjgh-2018-001002supp002.pdf]

**Supplemental Table 1. Among households with preference for private facilities, reasons for non-utilization of public facilities stratified by household location (N=162,382)**

**RURAL HOUSEHOLDS**

|                                                         | Households without hypertension | Households with hypertension only | Difference in % | chi-sq p-value | Households with hypertension and diabetes | Difference in % | chi-sq p-value |
|---------------------------------------------------------|---------------------------------|-----------------------------------|-----------------|----------------|-------------------------------------------|-----------------|----------------|
| <b>All households</b>                                   |                                 |                                   |                 |                |                                           |                 |                |
|                                                         | % <sup>a</sup>                  | % <sup>a</sup>                    |                 |                | % <sup>a</sup>                            |                 |                |
| Any access reason                                       | 70.2                            | 70.7                              | 0.50            | 0.29           | 68.2                                      | -2.00           | 0.002          |
| Any technical quality reason                            | 61.5                            | 63.9                              | 2.40            | <0.0001        | 64.3                                      | 2.80            | 0.0002         |
| Any non-technical quality reason                        | 55.6                            | 56.6                              | 1.00            | 0.05           | 58.9                                      | 3.30            | <0.0001        |
| Any quality reason (technical or non-technical quality) | 78.6                            | 79.6                              | 1.00            | 0.03           | 81.3                                      | 2.70            | <0.0001        |
| <b>Poor households</b>                                  |                                 |                                   |                 |                |                                           |                 |                |
| Any access reason                                       | 71.6                            | 72.6                              | 1.00            | 0.16           | 70.9                                      | -0.70           | 0.51           |
| Any technical quality reason                            | 61.0                            | 62.3                              | 1.30            | 0.09           | 60.7                                      | -0.30           | 0.83           |
| Any non-technical quality reason                        | 53.9                            | 53.9                              | 0.00            | 0.97           | 54.9                                      | 1.00            | 0.39           |
| Any quality reason (technical or non-technical quality) | 77.5                            | 77.3                              | -0.20           | 0.78           | 77.9                                      | 0.40            | 0.66           |
| <b>Households with no health insurance</b>              |                                 |                                   |                 |                |                                           |                 |                |
| Any access reason                                       | 70.9                            | 71.8                              | 0.90            | 0.11           | 68.4                                      | -2.50           | 0.001          |
| Any technical quality reason                            | 60.5                            | 62.5                              | 2.00            | 0.0008         | 63.2                                      | 2.70            | 0.002          |
| Any non-technical quality reason                        | 55.2                            | 56.4                              | 1.20            | 0.03           | 58.7                                      | 3.50            | <0.0001        |
| Any quality reason (technical or non-technical quality) | 77.7                            | 78.5                              | 0.80            | 0.09           | 80.8                                      | 3.10            | <0.0001        |

| <b>URBAN HOUSEHOLDS</b>                                      |                                        |                                          |                        |                       |                                                  |                        |                       |
|--------------------------------------------------------------|----------------------------------------|------------------------------------------|------------------------|-----------------------|--------------------------------------------------|------------------------|-----------------------|
|                                                              | <b>Households without hypertension</b> | <b>Households with hypertension only</b> | <b>Difference in %</b> | <b>chi-sq p-value</b> | <b>Households with hypertension and diabetes</b> | <b>Difference in %</b> | <b>chi-sq p-value</b> |
| <b>All households</b>                                        |                                        |                                          |                        |                       |                                                  |                        |                       |
|                                                              | % <sup>a</sup>                         | % <sup>a</sup>                           |                        |                       | % <sup>a</sup>                                   |                        |                       |
| Any access reason                                            | 65.1                                   | 65.9                                     | 0.80                   | 0.09                  | 63.2                                             | -1.90                  | 0.002                 |
| Any technical quality reason                                 | 57.0                                   | 58.9                                     | 1.90                   | 0.0005                | 58.3                                             | 1.30                   | 0.04                  |
| Any non-technical quality reason                             | 59.3                                   | 60.6                                     | 1.30                   | 0.01                  | 61.7                                             | 2.40                   | 0.0001                |
| Any quality reason (technical or non-technical quality)      | 78.4                                   | 80.0                                     | 1.60                   | 0.01                  | 80.4                                             | 2.00                   | 0.0001                |
| <b>Poor households</b>                                       |                                        |                                          |                        |                       |                                                  |                        |                       |
| Any access reason                                            | 68.2                                   | 68.5                                     | 0.30                   | 0.83                  | 68.3                                             | 0.10                   | 0.97                  |
| Any technical quality reason                                 | 56.3                                   | 58.4                                     | 2.10                   | 0.12                  | 58.4                                             | 2.10                   | 0.27                  |
| Any non-technical quality reason                             | 55.8                                   | 57.0                                     | 1.20                   | 0.38                  | 58.7                                             | 2.90                   | 0.12                  |
| Any quality reason (technical or non-technical quality)      | 76.6                                   | 78.2                                     | 1.60                   | 0.16                  | 80.2                                             | 3.60                   | 0.02                  |
| <b>Households with no health insurance</b>                   |                                        |                                          |                        |                       |                                                  |                        |                       |
| Any access reason                                            | 65.8                                   | 67.3                                     | 1.50                   | 0.008                 | 63.6                                             | -2.20                  | 0.002                 |
| Any technical quality reason                                 | 56.8                                   | 58.5                                     | 1.70                   | 0.004                 | 57.7                                             | 0.90                   | 0.17                  |
| Any non-technical quality reason                             | 59.1                                   | 59.7                                     | 0.60                   | 0.32                  | 61.2                                             | 2.10                   | 0.003                 |
| Any quality reason (technical or non-technical quality)      | 77.8                                   | 78.6                                     | 0.80                   | 0.11                  | 79.7                                             | 1.90                   | 0.002                 |
| <sup>a</sup> Sampling weight proportion / standard deviation |                                        |                                          |                        |                       |                                                  |                        |                       |
