# Supplementary material for: Reasons for low utilisation of public facilities among households with hypertension: analysis of a population-based survey in India
Source: PubMed Central journal article supplement (PMC6307571; doi:10.1136/bmjgh-2018-001002), 2018-12-20
Supplement: bmjgh-2018-001002supp003.pdf [file bmjgh-2018-001002supp003.pdf]

**Supplemental Table 2. Demographic characteristics of households without valid biomarker data (N=41,890)**

| <b>Household demographics</b>                  | <b>N</b> | <b>%<sup>a</sup></b> |
|------------------------------------------------|----------|----------------------|
| Mean age of household members (mean, SD)       | 35.7     | 14.4                 |
| Mean age of head of household (mean, SD)       | 49.9     | 14.0                 |
| Any household member <5 years of age           | 9,220    | 22.4                 |
| Any household member ≥ 65 years of age         | 10,444   | 25.6                 |
| Mean household size (mean, SD)                 | 4.0      | 2.0                  |
| Mean number of males in household (mean, SD)   | 2.0      | 1.2                  |
| Mean number of females in household (mean, SD) | 2.0      | 1.2                  |
| Sex of head of household is male               | 34,868   | 83.6                 |
| Hindu religion (vs. all other religions)       | 31,293   | 79.5                 |
| Household has health insurance                 | 9,985    | 28.6                 |
| Household has a below the poverty line card    | 15,150   | 41.2                 |
| Household has electricity                      | 40,126   | 95.9                 |
| Household has a bicycle                        | 14,392   | 38.9                 |
| Poor (lowest 40%)                              | 15,274   | 38.2                 |
| Rural household location                       | 21,690   | 53.1                 |

<sup>a</sup>Sampling weight proportion / standard deviation
